# Supplementary material
Source: PubMed Central journal article supplement (PMC8839149)

## SUPPLEMENTARY INFORMATION GUIDE

### **Tumour DDR1 Promotes Collagen Fibre Alignment to Instigate Immune Exclusion**

Xiujie Sun<sup>1#</sup>, Bogang Wu<sup>1#</sup>, Huai-Chin Chiang<sup>1#</sup>, Hui Deng<sup>2</sup>, Xiaowen Zhang<sup>1</sup>, Wei Xiong<sup>2</sup>, Junquan Liu<sup>2</sup>, Aaron M. Rozeboom<sup>3</sup>, Brent Harris<sup>3</sup>, Eline Blommaert<sup>4</sup>, Antonio Gomez<sup>5</sup>, Roderic Espin Garcia<sup>4</sup>, Yufan Zhou<sup>6</sup>, Payal Mitra<sup>7</sup>, Madeleine Prevost<sup>1</sup>, Deyi Zhang<sup>8</sup>, Debarati Banik<sup>1</sup>, Claudine Isaacs<sup>3</sup>, Deborah Berry<sup>3</sup>, Catherine Lai<sup>3</sup>, Krysta Chaldekis<sup>3</sup>, Patricia S. Latham<sup>9</sup>, Christine A. Brantner<sup>10</sup>, Anastas Popratiloff<sup>10</sup>, Victor X. Jin<sup>6</sup>, Ningyan Zhang<sup>2</sup>, Yanfen Hu<sup>7</sup>, Miguel Angel Pujana<sup>4\*</sup>, Tyler J. Curiel<sup>8\*</sup>, Zhiqiang An<sup>2\*</sup>, Rong Li<sup>1\*</sup>

<sup>1</sup>Department of Biochemistry & Molecular Medicine,

<sup>7</sup>Department of Anatomy & Cell Biology, <sup>9</sup>Department of Pathology,  
School of Medicine & Health Sciences,

<sup>10</sup>GW Nanofabrication and Imaging Center,

The George Washington University, Washington, DC 20037, USA

<sup>2</sup>Texas Therapeutics Institute, Brown Foundation Institute of Molecular Medicine,  
The University of Texas Health Science Center at Houston, Houston, TX 77030, USA

<sup>3</sup>Lombardi Comprehensive Cancer Center,

Georgetown University, Washington, DC 20007, USA

<sup>4</sup>ProCURE, Catalan Institute of Oncology, Oncobell, Bellvitge Institute for Biomedical  
Research (IDIBELL), L'Hospitalet del Llobregat, Barcelona, Catalonia, Spain

<sup>5</sup>Rheumatology Department and Rheumatology Research Group, Vall d'Hebron Hospital  
Research Institute, Barcelona, Spain

<sup>6</sup>Department of Molecular Medicine, <sup>8</sup>Department of Medicine, The Mays Cancer Center,  
University of Texas Health San Antonio, San Antonio, TX 78229, USA

Running Title: Breaking down DDR1-dependent immune exclusion

#These authors contributed equally to the work

\*Correspondence to: R.L. ([rli69@gwu.edu](mailto:rli69@gwu.edu)), Z.A. ([Zhiqiang.An@uth.tmc.edu](mailto:Zhiqiang.An@uth.tmc.edu)), T.J.C. ([curielt@uthscsa.edu](mailto:curielt@uthscsa.edu)), M.A.P. ([mapujana@iconcologia.net](mailto:mapujana@iconcologia.net))

## Table of Contents

**Supplementary Figure 1.** Gel source data for Main Figure 1a. (Page 1)

**Supplementary Figure 2.** Gel source data for Extended Figure 1a. (Page 2)

**Supplementary Figure 3.** Representative gating strategies for flow cytometry analysis of TILs used in this study. (Page 3)

**Supplementary Figure 4.** Immune- related transcriptomic changes. (Page 4-5)

**Supplementary Figure 5.** PCA of transcriptome profiles across studies and samples. (Page 6-7)

**Supplementary Figure 6.** DEGs between *Ddr1*-KO and WT tumours/cells. (Page 8-9)

**Supplementary Figure 7.** Profiles of DEGs from immunocompetent host tumours and GO annotations. (Page 10-11)

**Supplementary Figure 8.** Gel source data for Extended Data Figure 5c. (Page 12)

**Supplementary Figure 9.** Gel source data for Extended Data Figure 5d. (Page 13)

**Supplementary Figure 10.** Gel source data for Extended Data Figure 5g. (Page 14)

**Supplementary Figure 11.** Gel source data for Extended Data Figure 5h. (Page 15)

**Supplementary Figure 12.** Gel source data for Extended Data Figure 5i. (Page 16)

**Supplementary Figure 13.** Gel source data for Extended Data Figure 7a. (Page 17)

**Supplementary Figure 14.** GO analysis of DEGs from RNA-seq of E0771 KO+huDDR1 tumours, treated with control IgG and anti-DDR1 antibody (#9) (n=4 each group; harvested on day 6 after antibody administration). (Page 18)

**Supplementary Figure 1.** Gel source data for Main Figure 1a

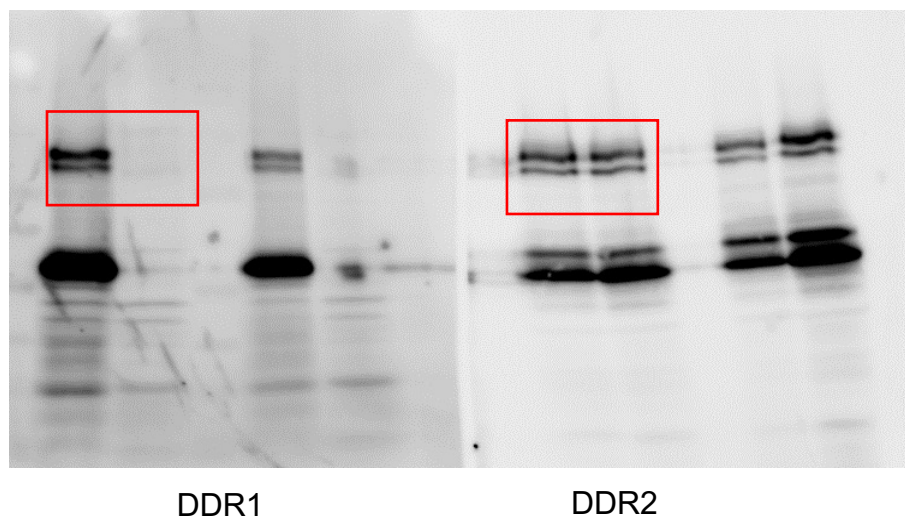

Overlay with marker

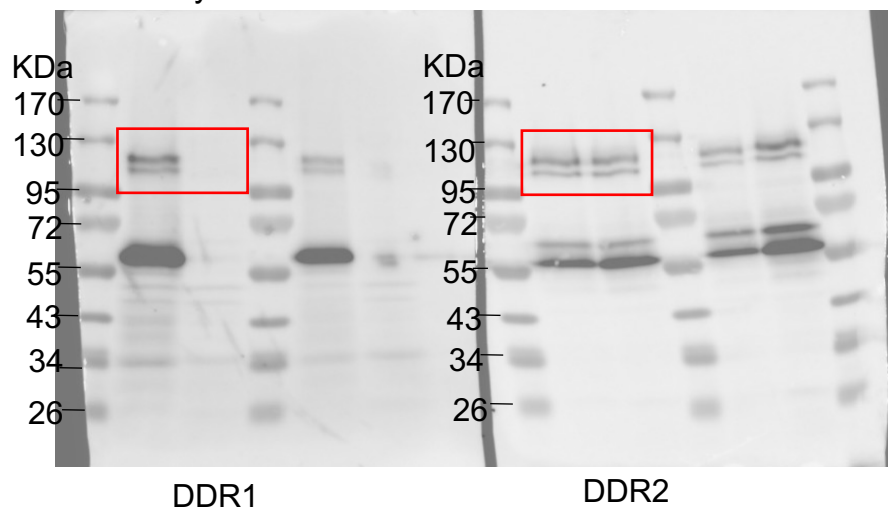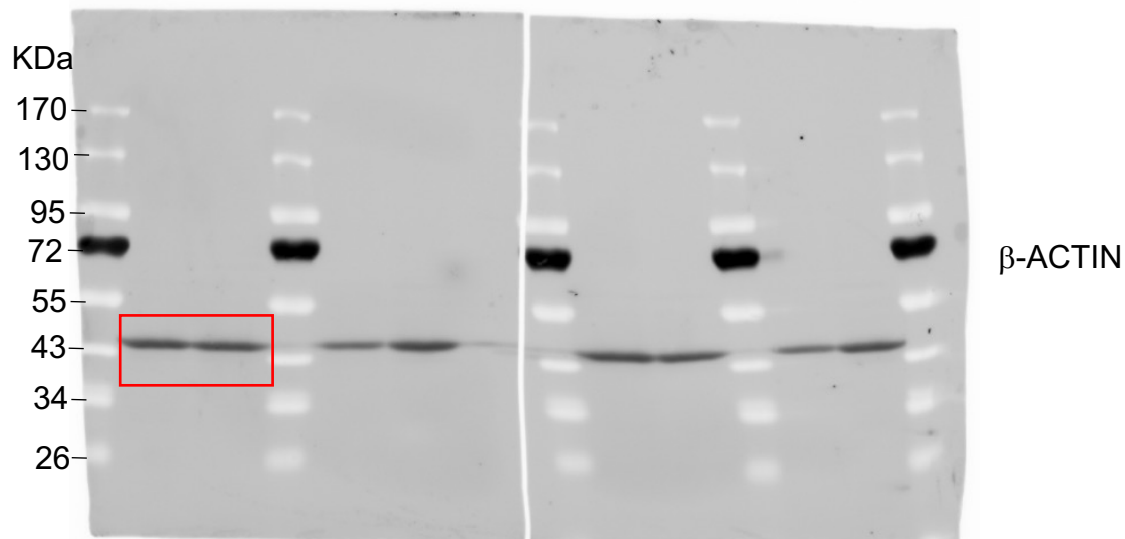

**Supplementary Figure 2.** Gel source data for Extended Data Figure 1a

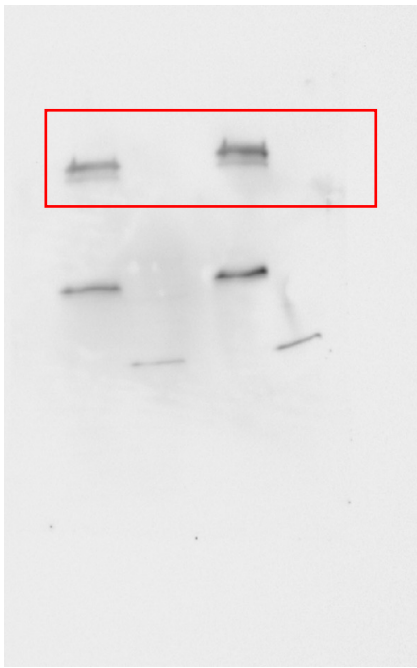

DDR1

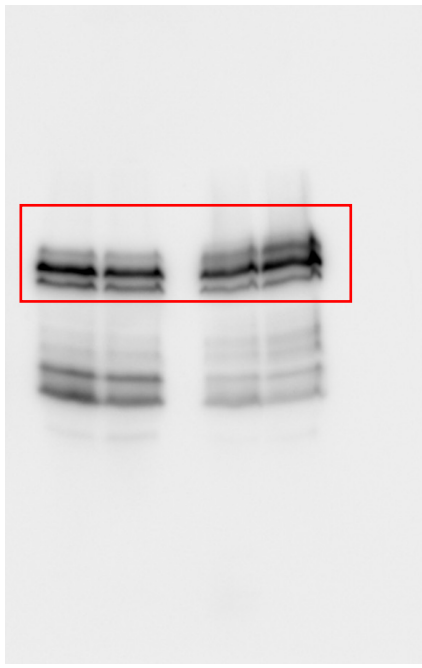

DDR2

Overlay with marker

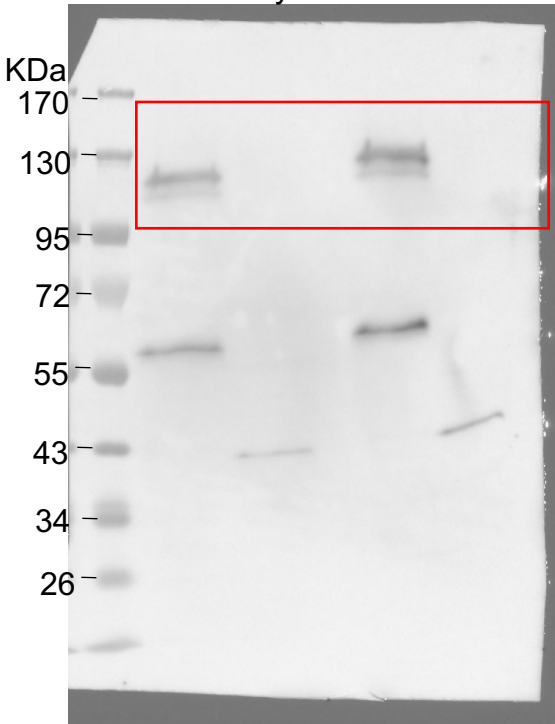

DDR1

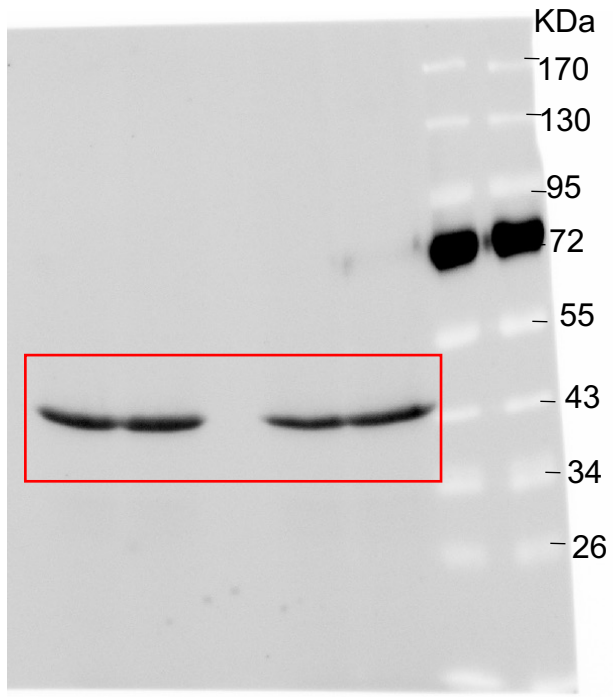

$\beta$ -ACTIN

**Supplementary Figure 3.** Representative gating strategies for flow cytometry analysis of TILs used in this study.

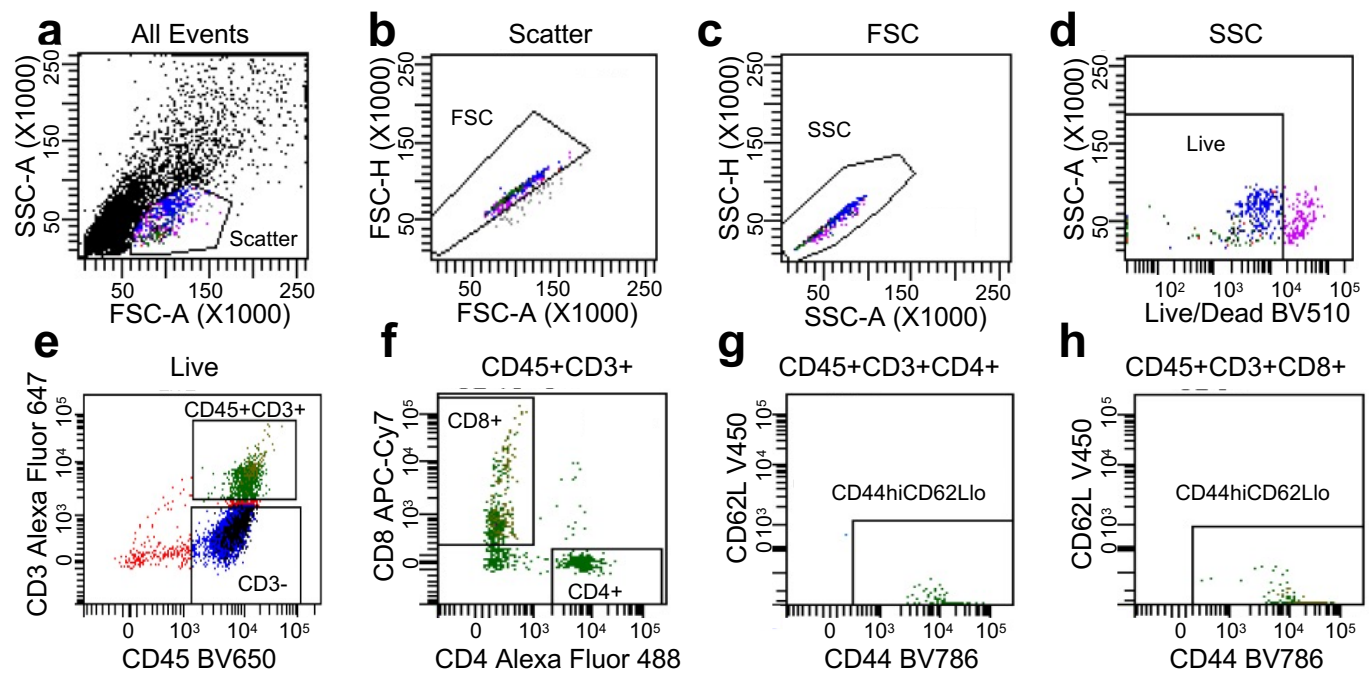

# Supplementary Figure 4. Immune-related transcriptomic changes

**a**

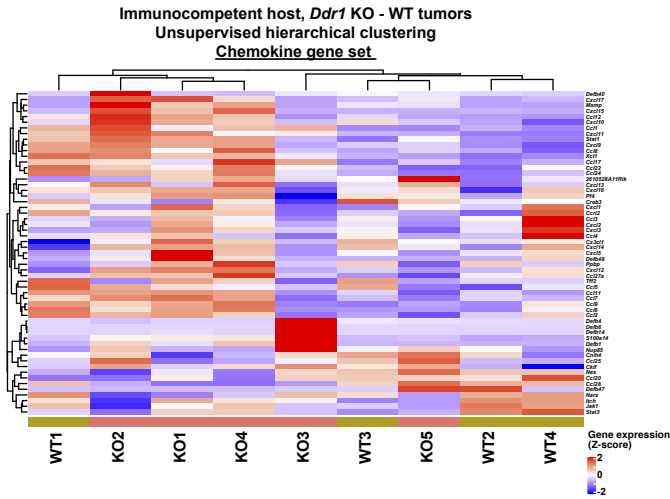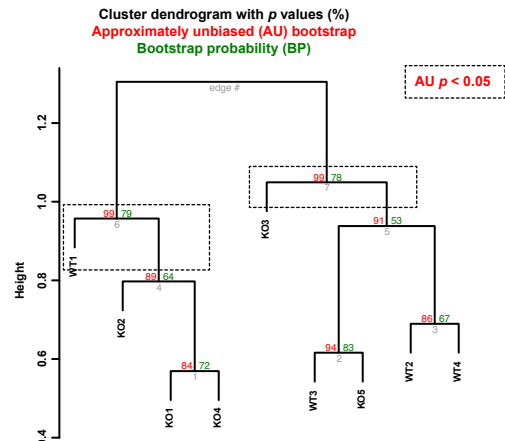

**b**

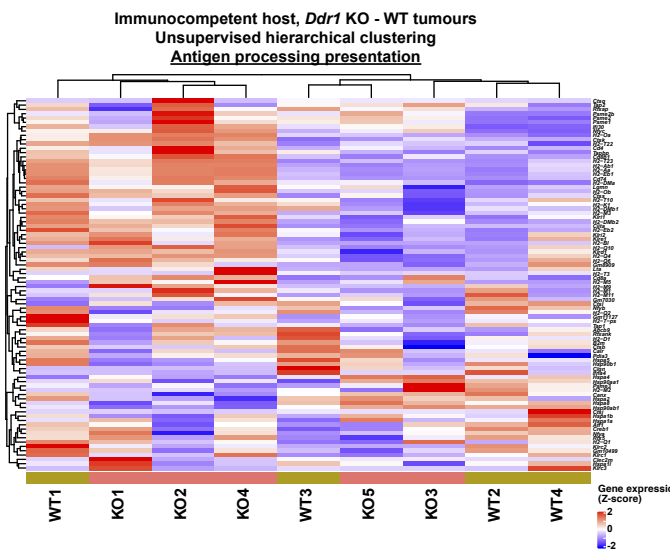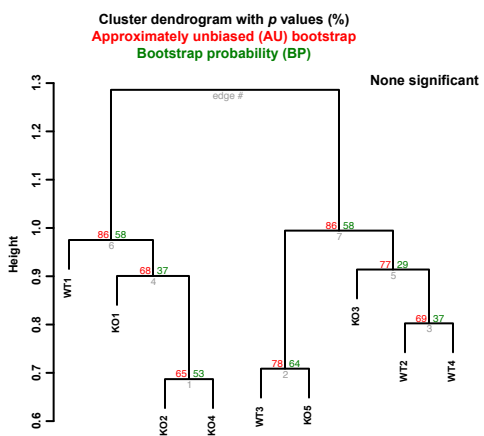

**c**

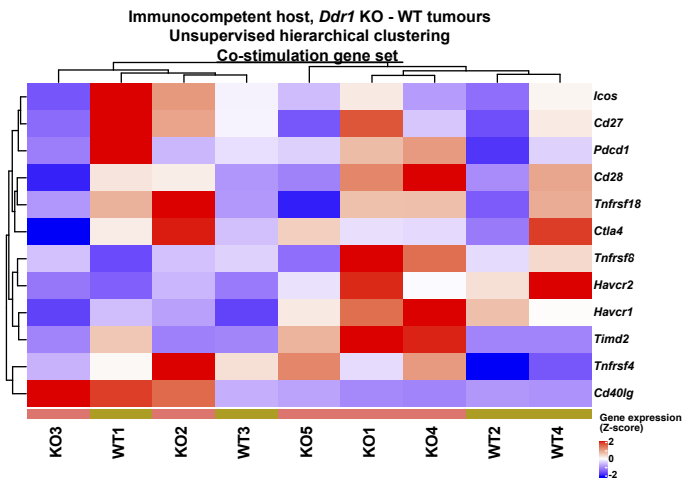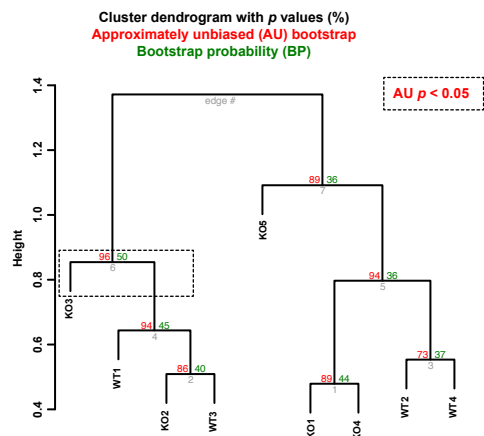

#### Supplementary Figure 4. Immune-related transcriptomic changes.

(a-c) Left panels, unsupervised hierarchical clustering of the expression of immune-related gene sets in *Ddr1*-WT and KO tumours from immunocompetent hosts: chemokine genes (a); genes involved in antigen processing/presentation (b); and co-stimulation genes (c). Right panels, hierarchical clustering performed for the gene sets using the R package Pvcust. Values at branches are approximately unbiased (AU)  $p$  values (left, red font) and bootstrap probability (BP) values (right, green font). The clusters considered significant (AU  $p < 0.05$ ) are marked by dashed rectangles.

# Supplementary Figure 5. PCA of transcriptome profiles across studies and samples

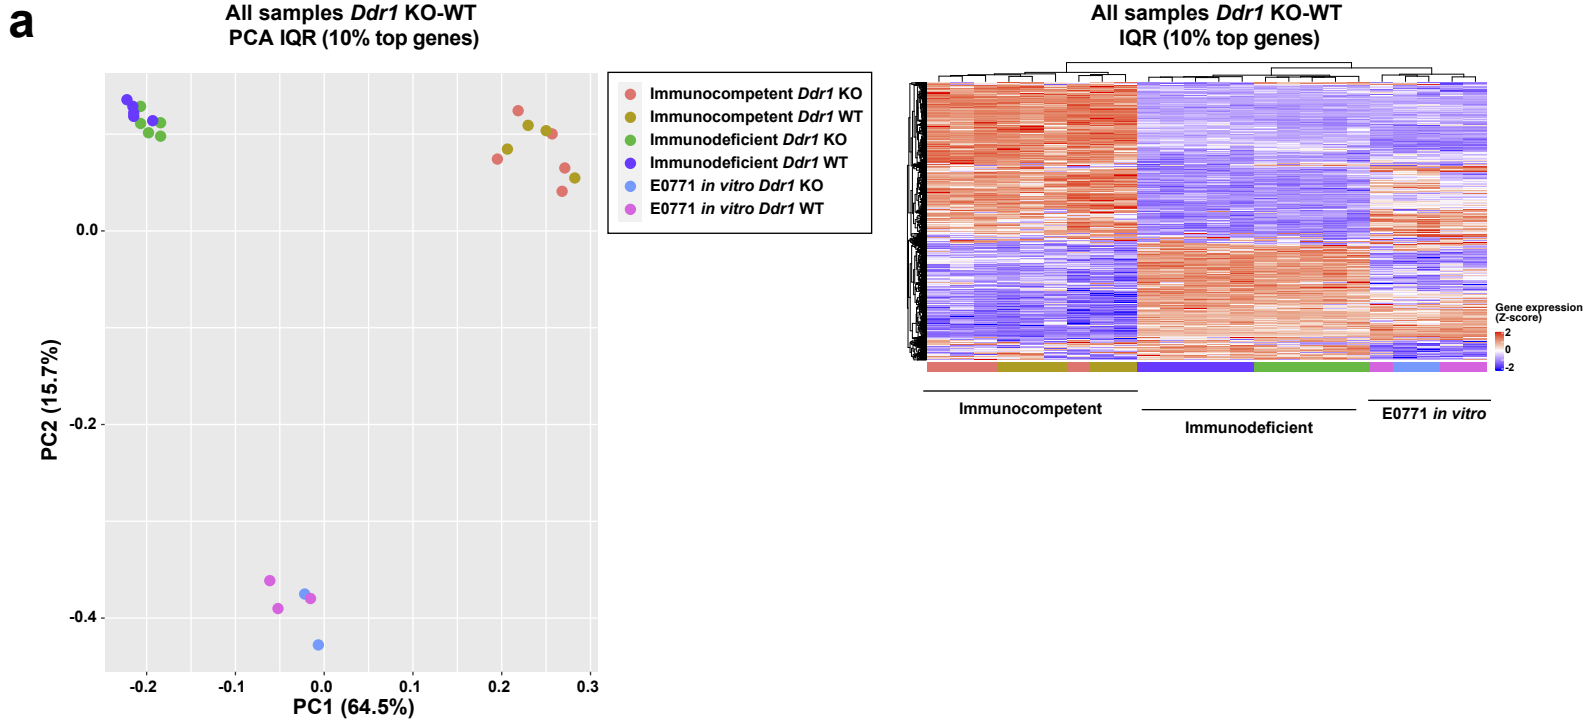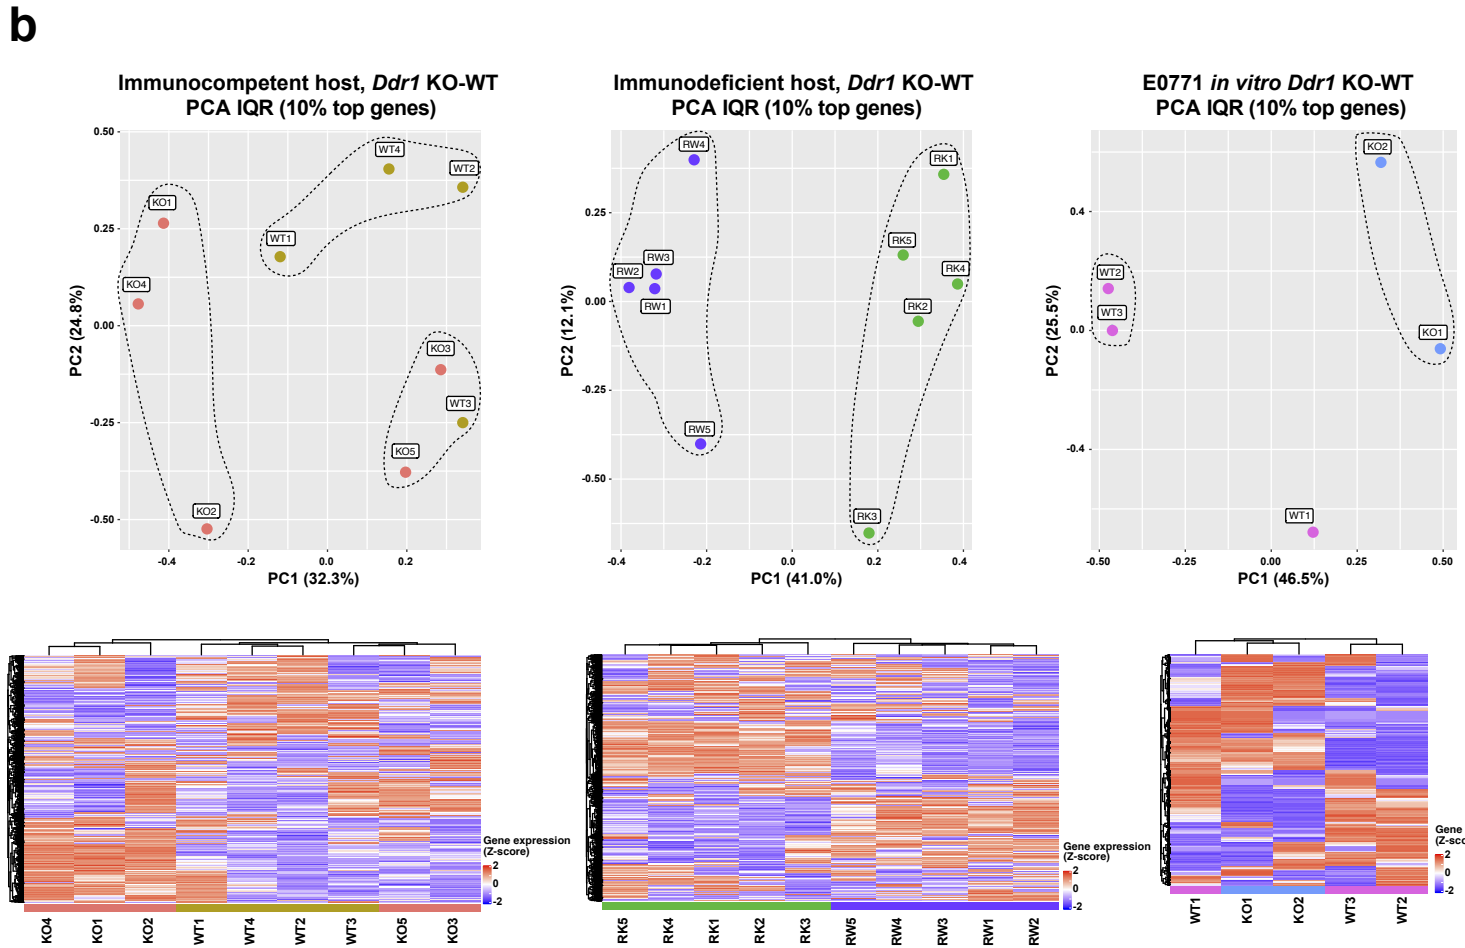



**Supplementary Figure 5. PCA of transcriptome profiles across studies and samples. (a)**

Left panel, PCA plot including all tumours/cells analysed by RNA-seq. Right panel, unsupervised hierarchical clustering of the genes with the highest (10% top) IQR. The gene list is provided in Extended Data Table 1. **(b)** Top panels, PCA plots of the tumours/cells analysed by RNA-seq in each setting. Bottom panels, unsupervised hierarchical clustering of the genes with the highest (10% top) IQR in each setting. The gene lists are provided in Supplementary Table 1.

# Supplementary Figure 6. DEGs between *Ddr1*-KO and WT tumours/cells

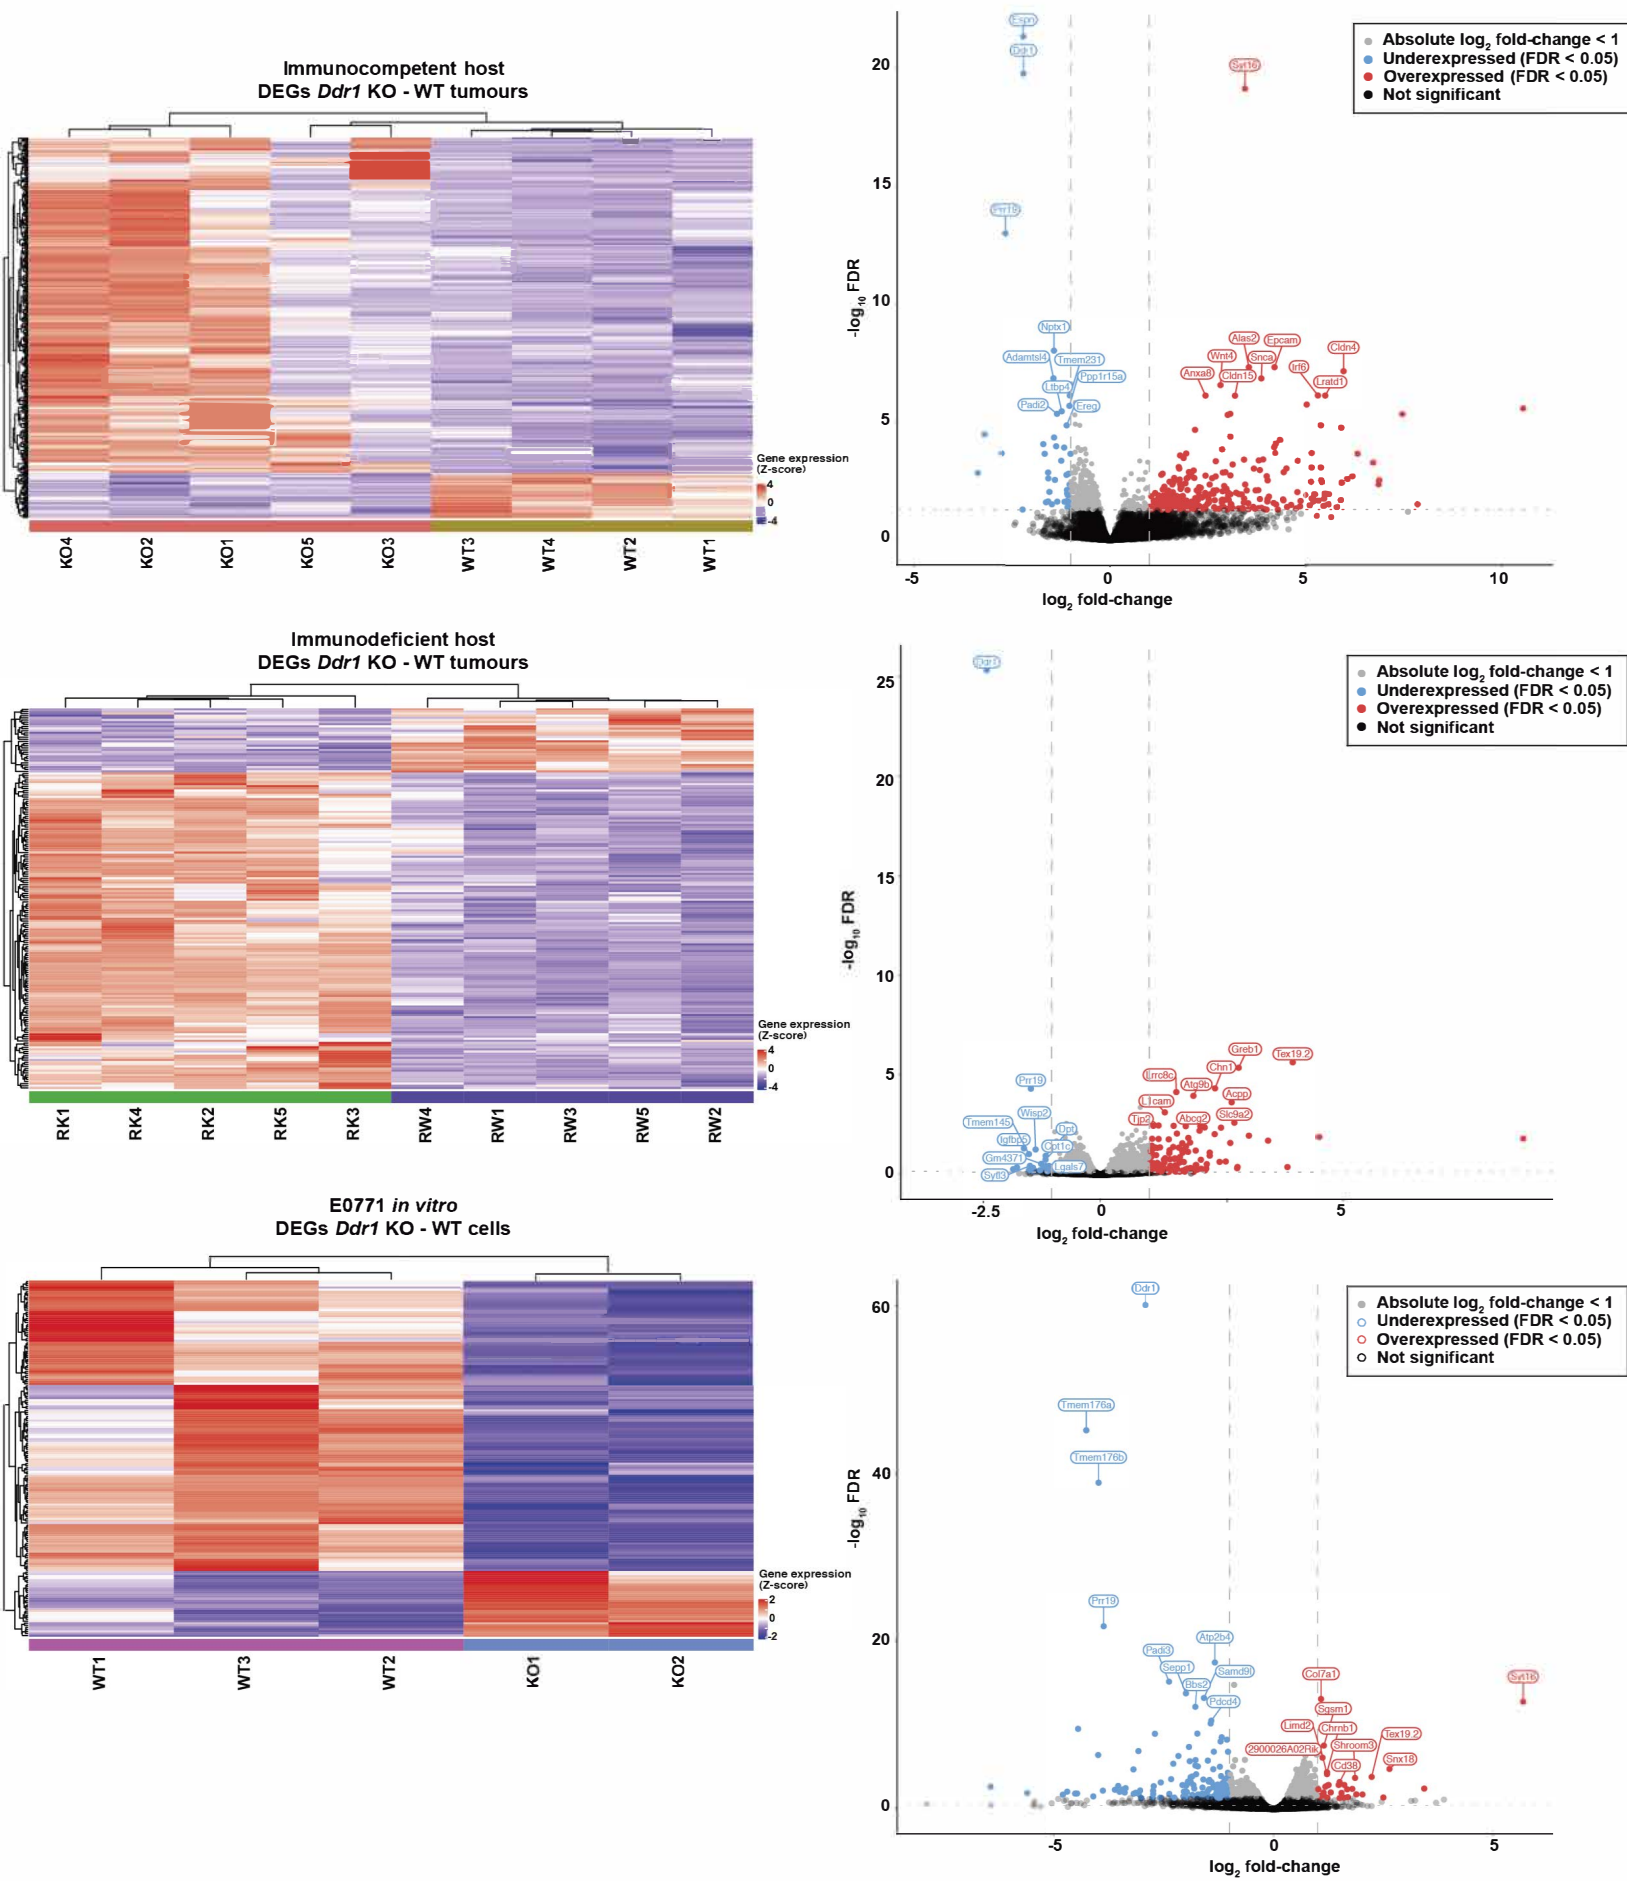

**Supplementary Figure 6. DEGs between *Ddr1*-KO and WT tumours/cells.** Left panels, unsupervised hierarchical clustering of DEGs (FDR-adjusted  $p < 0.05$ ) in each setting (top, immunocompetent host; middle, immunodeficient host; bottom, E0771 cells *in vitro*). Right panels, Volcano plots of differential gene expression between *Ddr1*-KO and WT tumours/cells. Genes are plotted in different colours depending on their significance and absolute  $\log_2$  fold-change (inset). The names of the 10-top differentially expressed genes in each direction and setting are indicated. The complete lists of DEGs are provided in Supplementary Table 2.

**Supplementary Figure 7. Profiles of DEGs from immunocompetent host tumours and GO annotations**

**a**

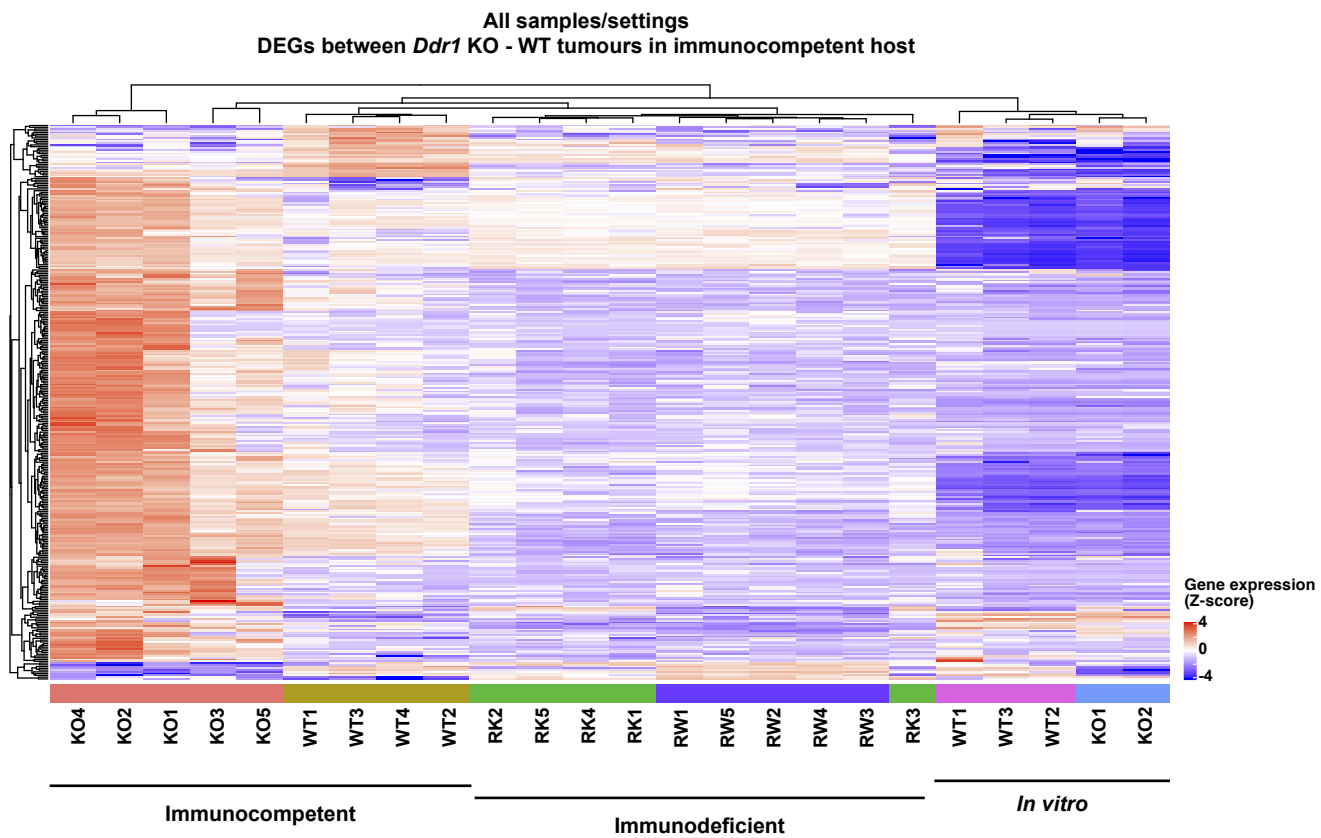

**b**

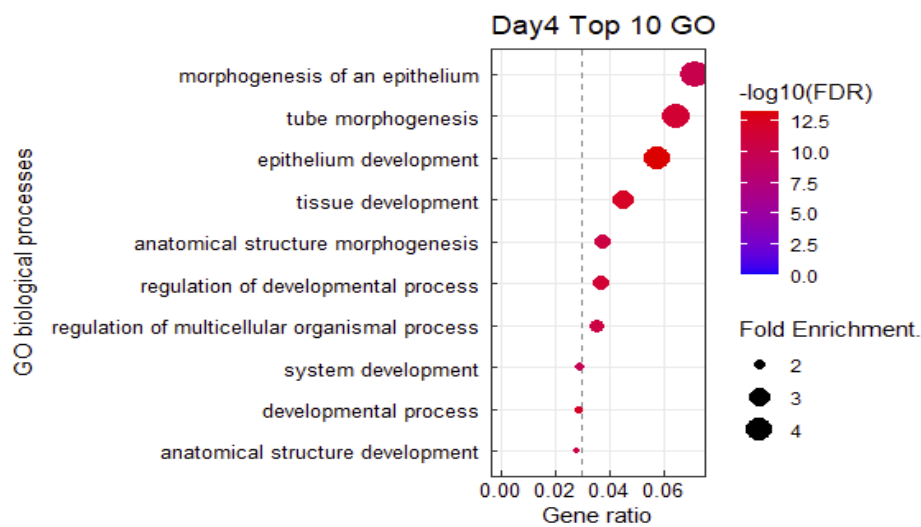

**Supplementary Figure 7. Profiles of DEGs from immunocompetent host tumours and GO annotations.** (a) Unsupervised hierarchical clustering of all settings/samples using DEGs identified in the comparison between *Ddr1*-KO and WT tumours developed in immunocompetent host. (b) GO analysis of immunocompetent host-unique DEGs.

**Supplementary Figure 8.** Gel source data for Extended Data Figure 5c

M-Wnt

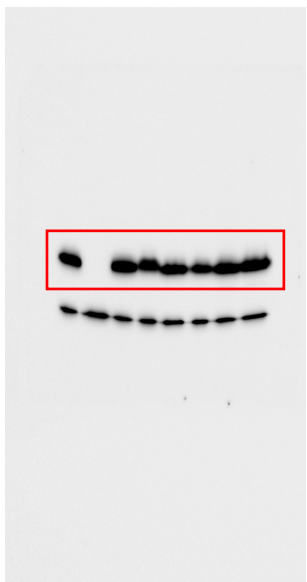

Flag

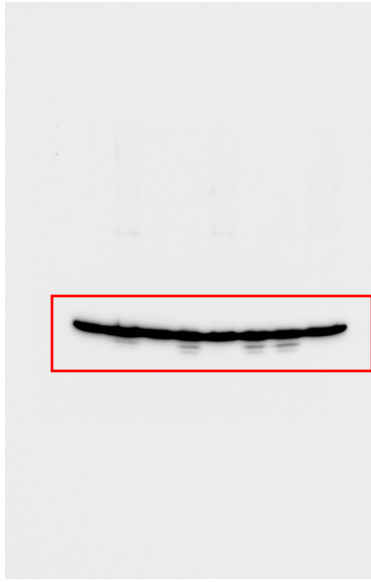

GAPDH

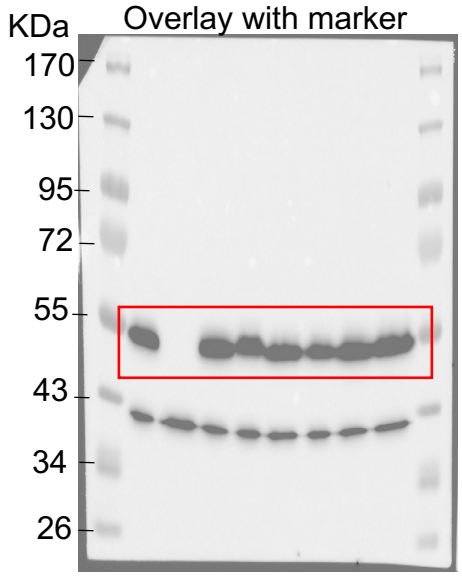

Flag

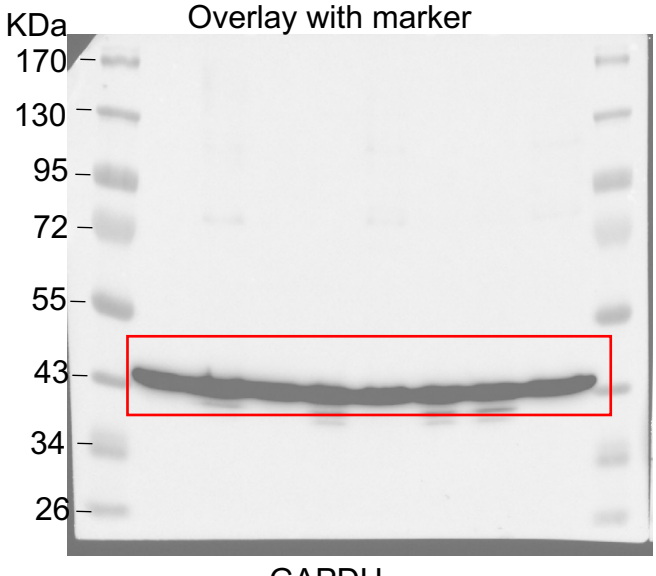

GAPDH

**Supplementary Figure 9.** Gel source data for Extended Data Figure 5d

AT-3

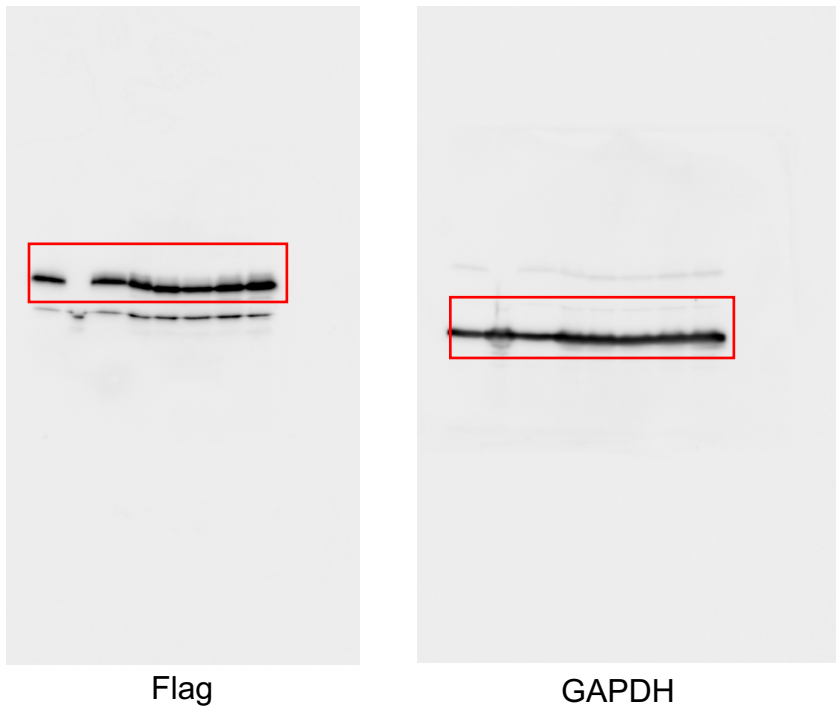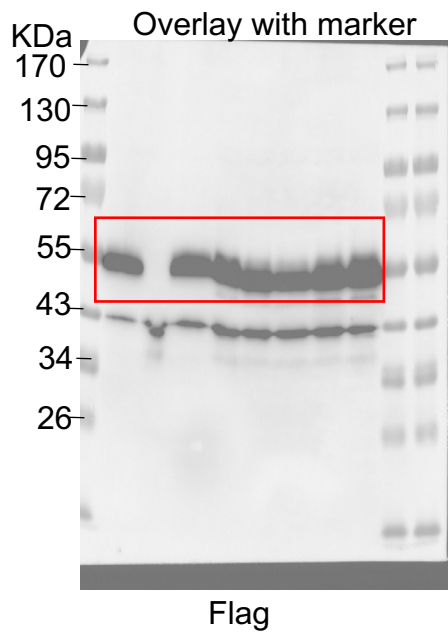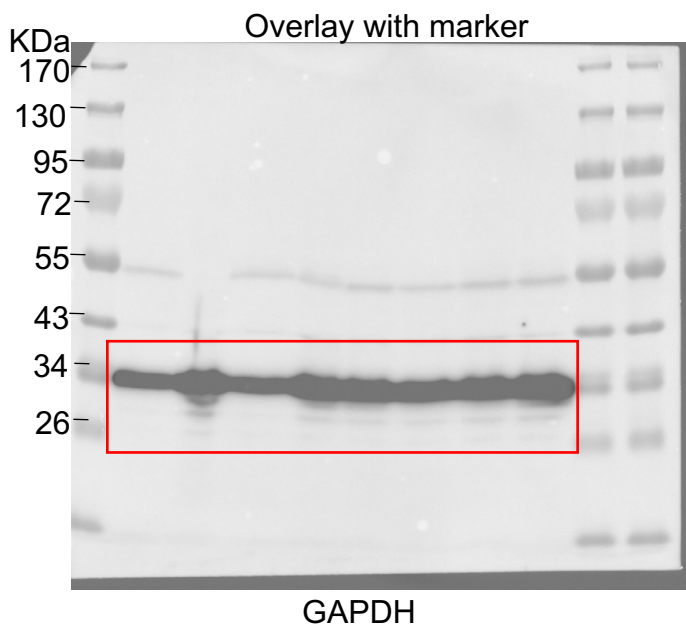

**Supplementary Figure 10.** Gel source data for Extended Data Figure 5g

Conditioned Medium:

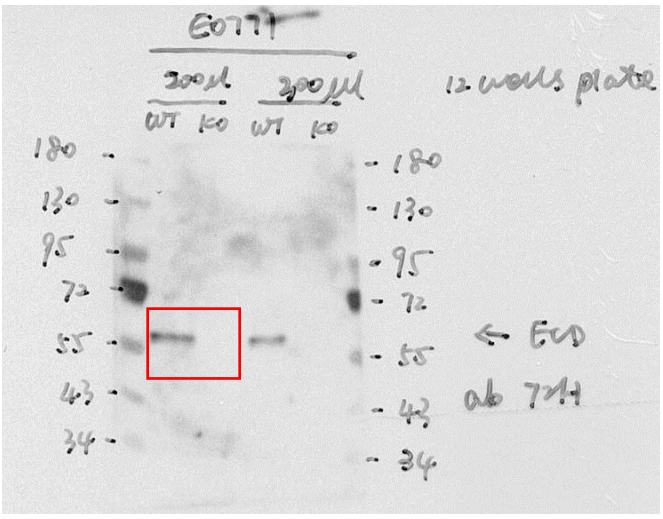

DDR1 ECD

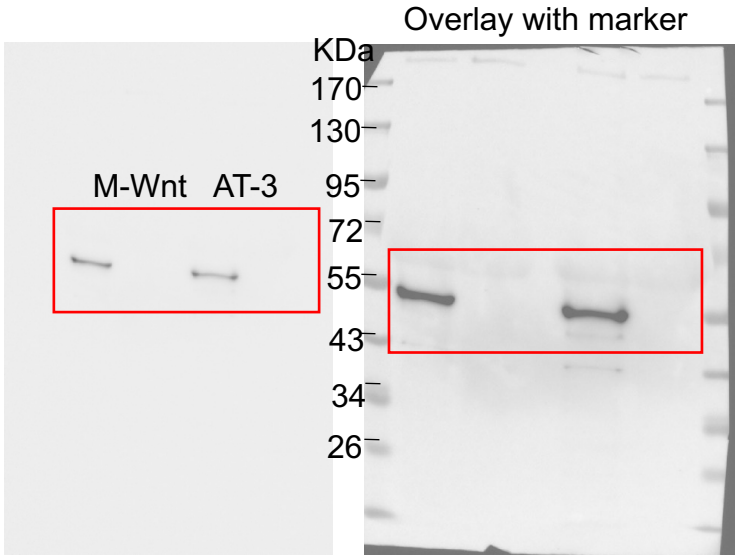

DDR1 ECD

DDR1 ECD

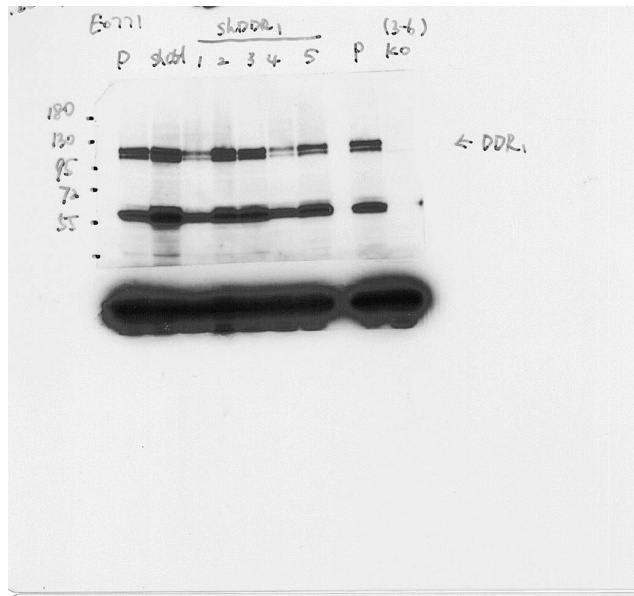

FL DDR1

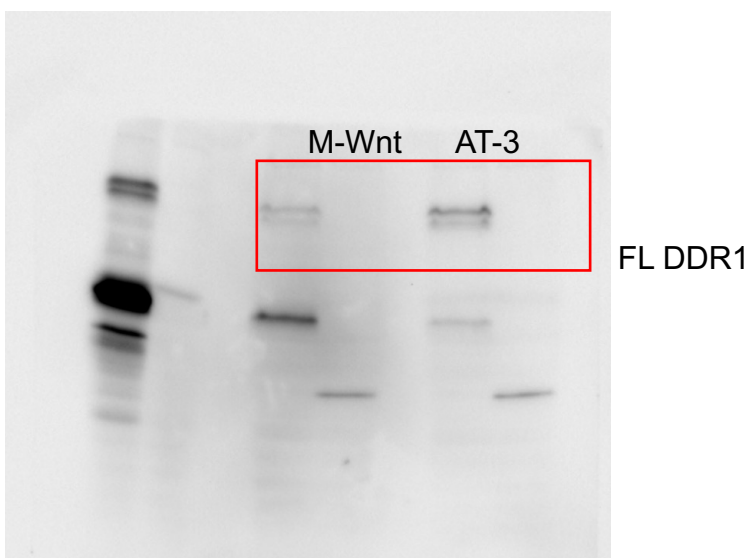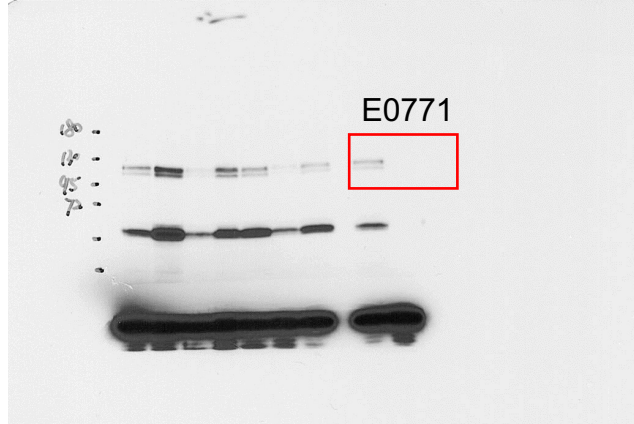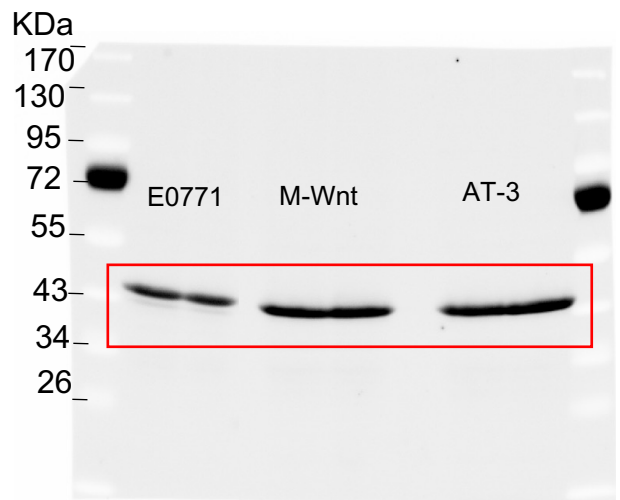

beta-ACTIN



**Supplementary Figure 11.** Gel source data for Extended Data Figure 5h

Conditioned Medium

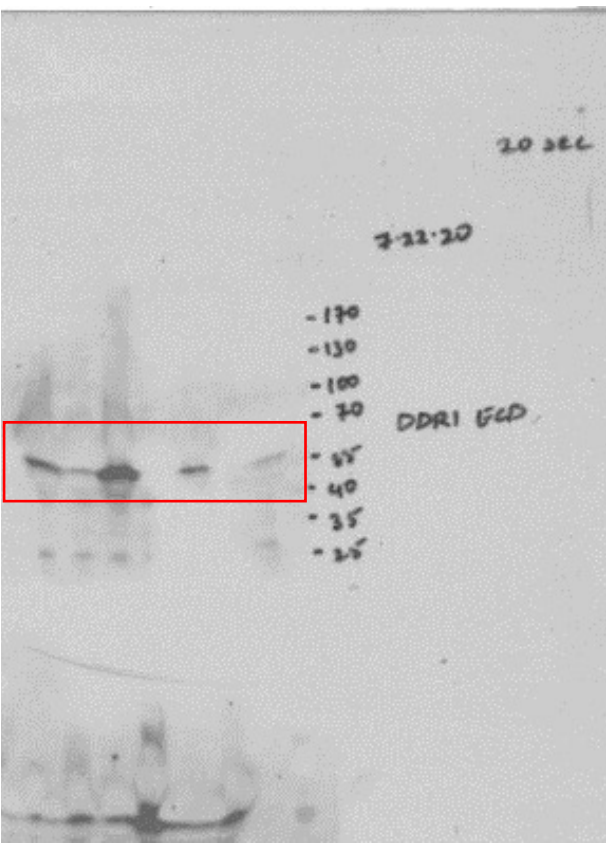

DDR1 ECD

Overlay with marker

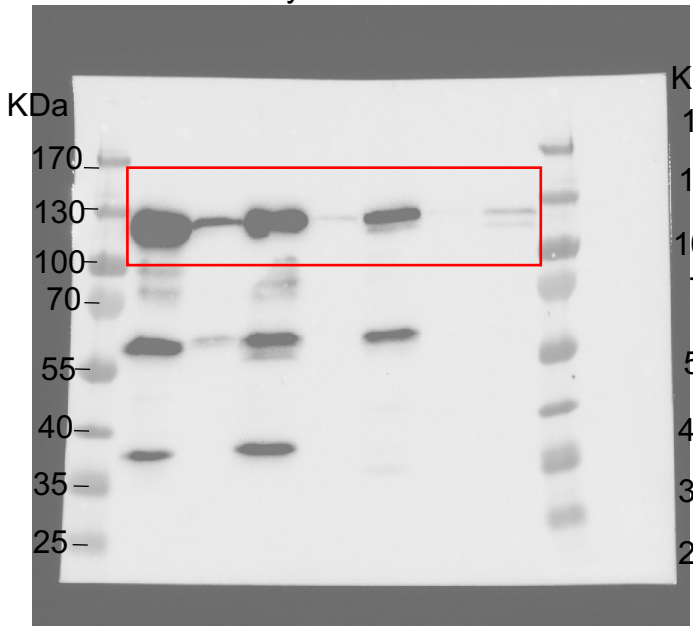

FL DDR1

Overlay with marker

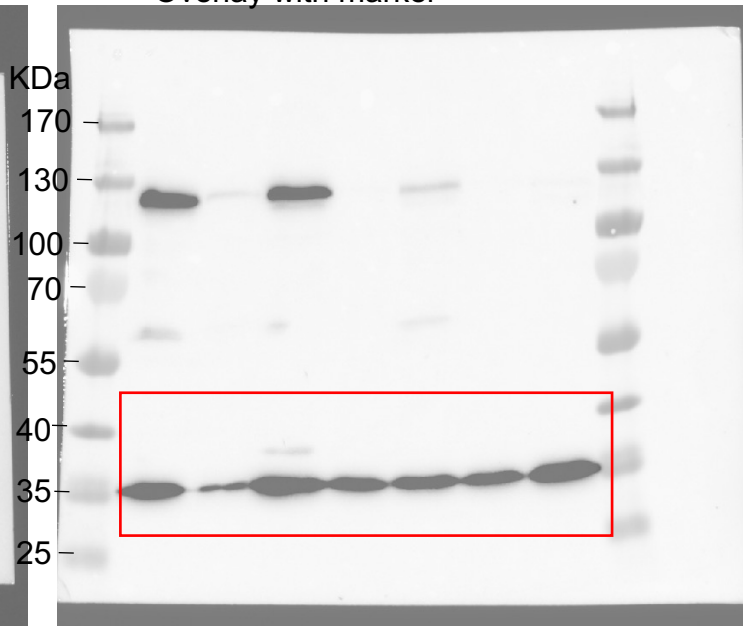

GAPDH (probed after stripping)

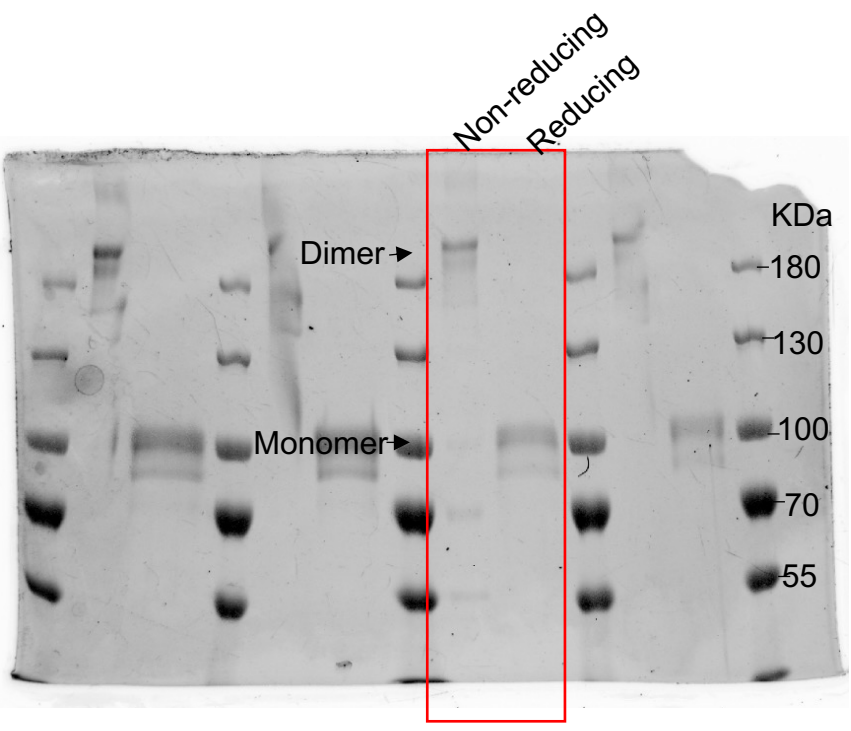

Coomassie Gel Staining

Supplementary Figure 13. Gel source data for Extended Data Figure 7a

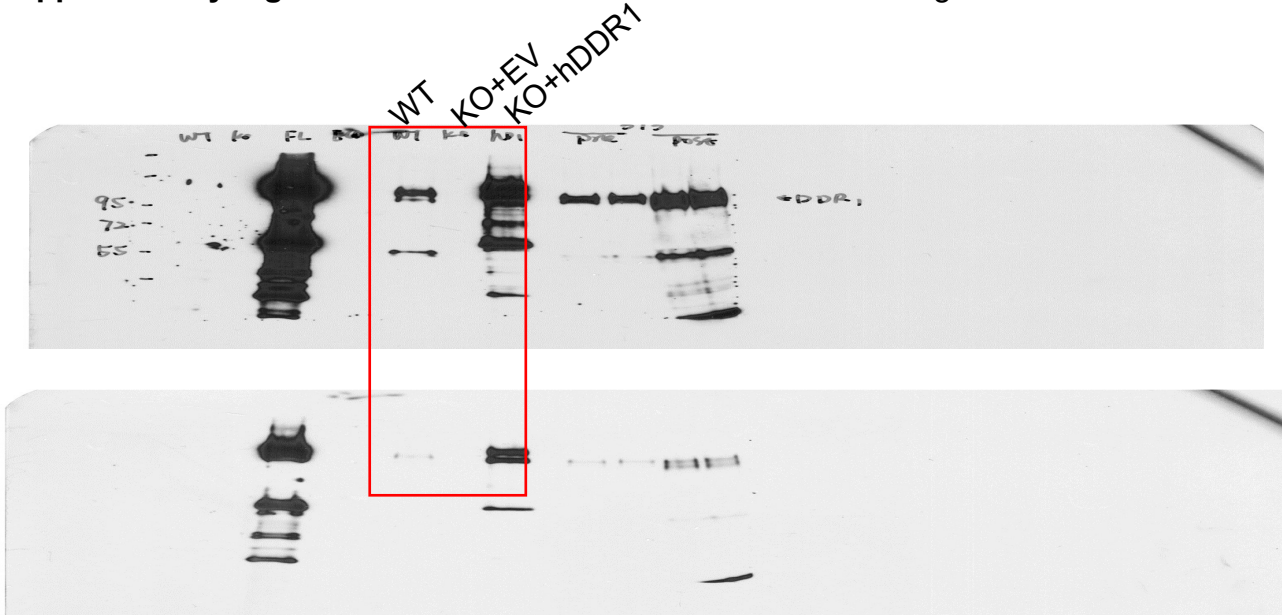

FL DDR1

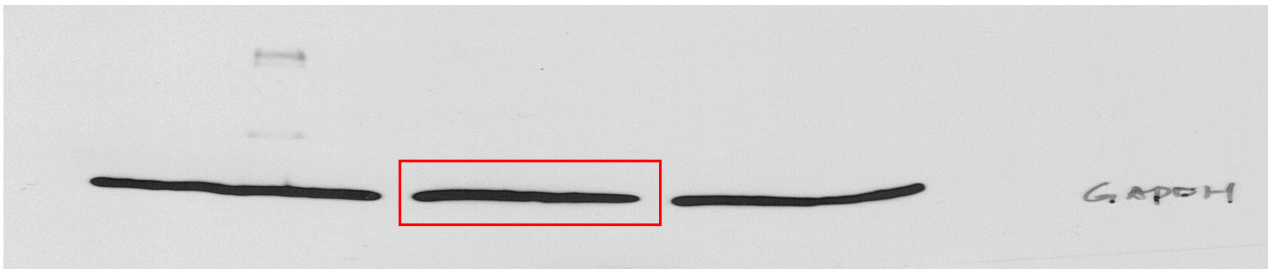

GAPDH

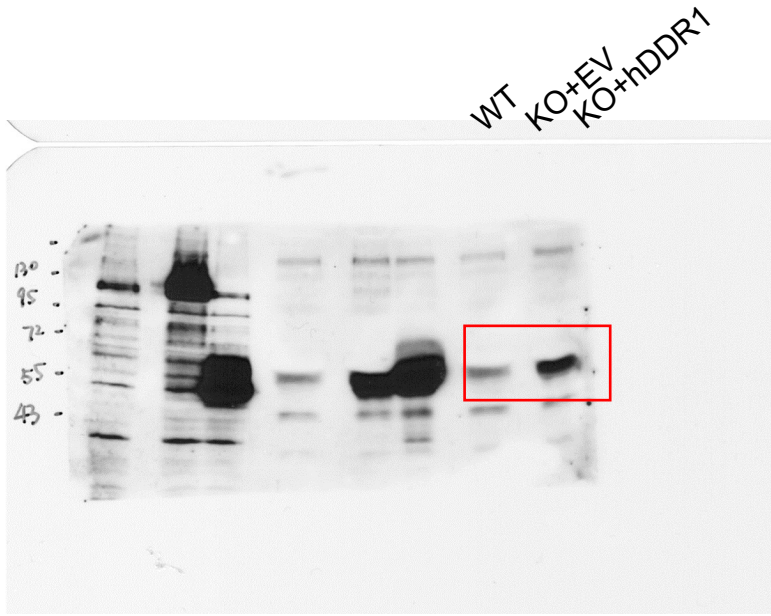

DDR1 ECD

**Supplementary Figure 14.** GO analysis of DEGs from RNA-seq of E0771 KO+huDDR1 tumours, treated with control IgG and anti-DDR1 antibody (#9) (n=4 each group; harvested on day 6 after antibody administration).

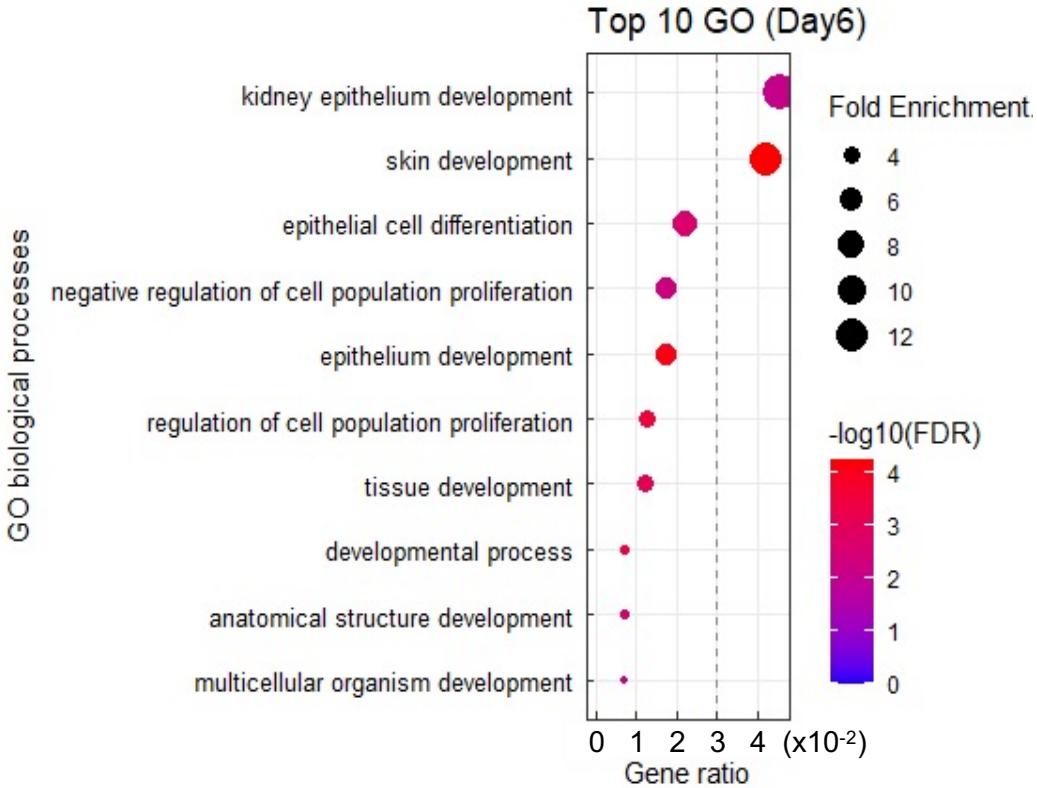

Supplement: NIHMS1773797-supplement-supp_info_guide.pdf [file NIHMS1773797-supplement-supp_info_guide.pdf]
